# Supplementary material
Source: PubMed Central journal article supplement (PMC4403399)
Supplement: JVI.03435-14_zjv999090181so1.pdf [file JVI.03435-14_zjv999090181so1.pdf]

# Supplementary Figure S1

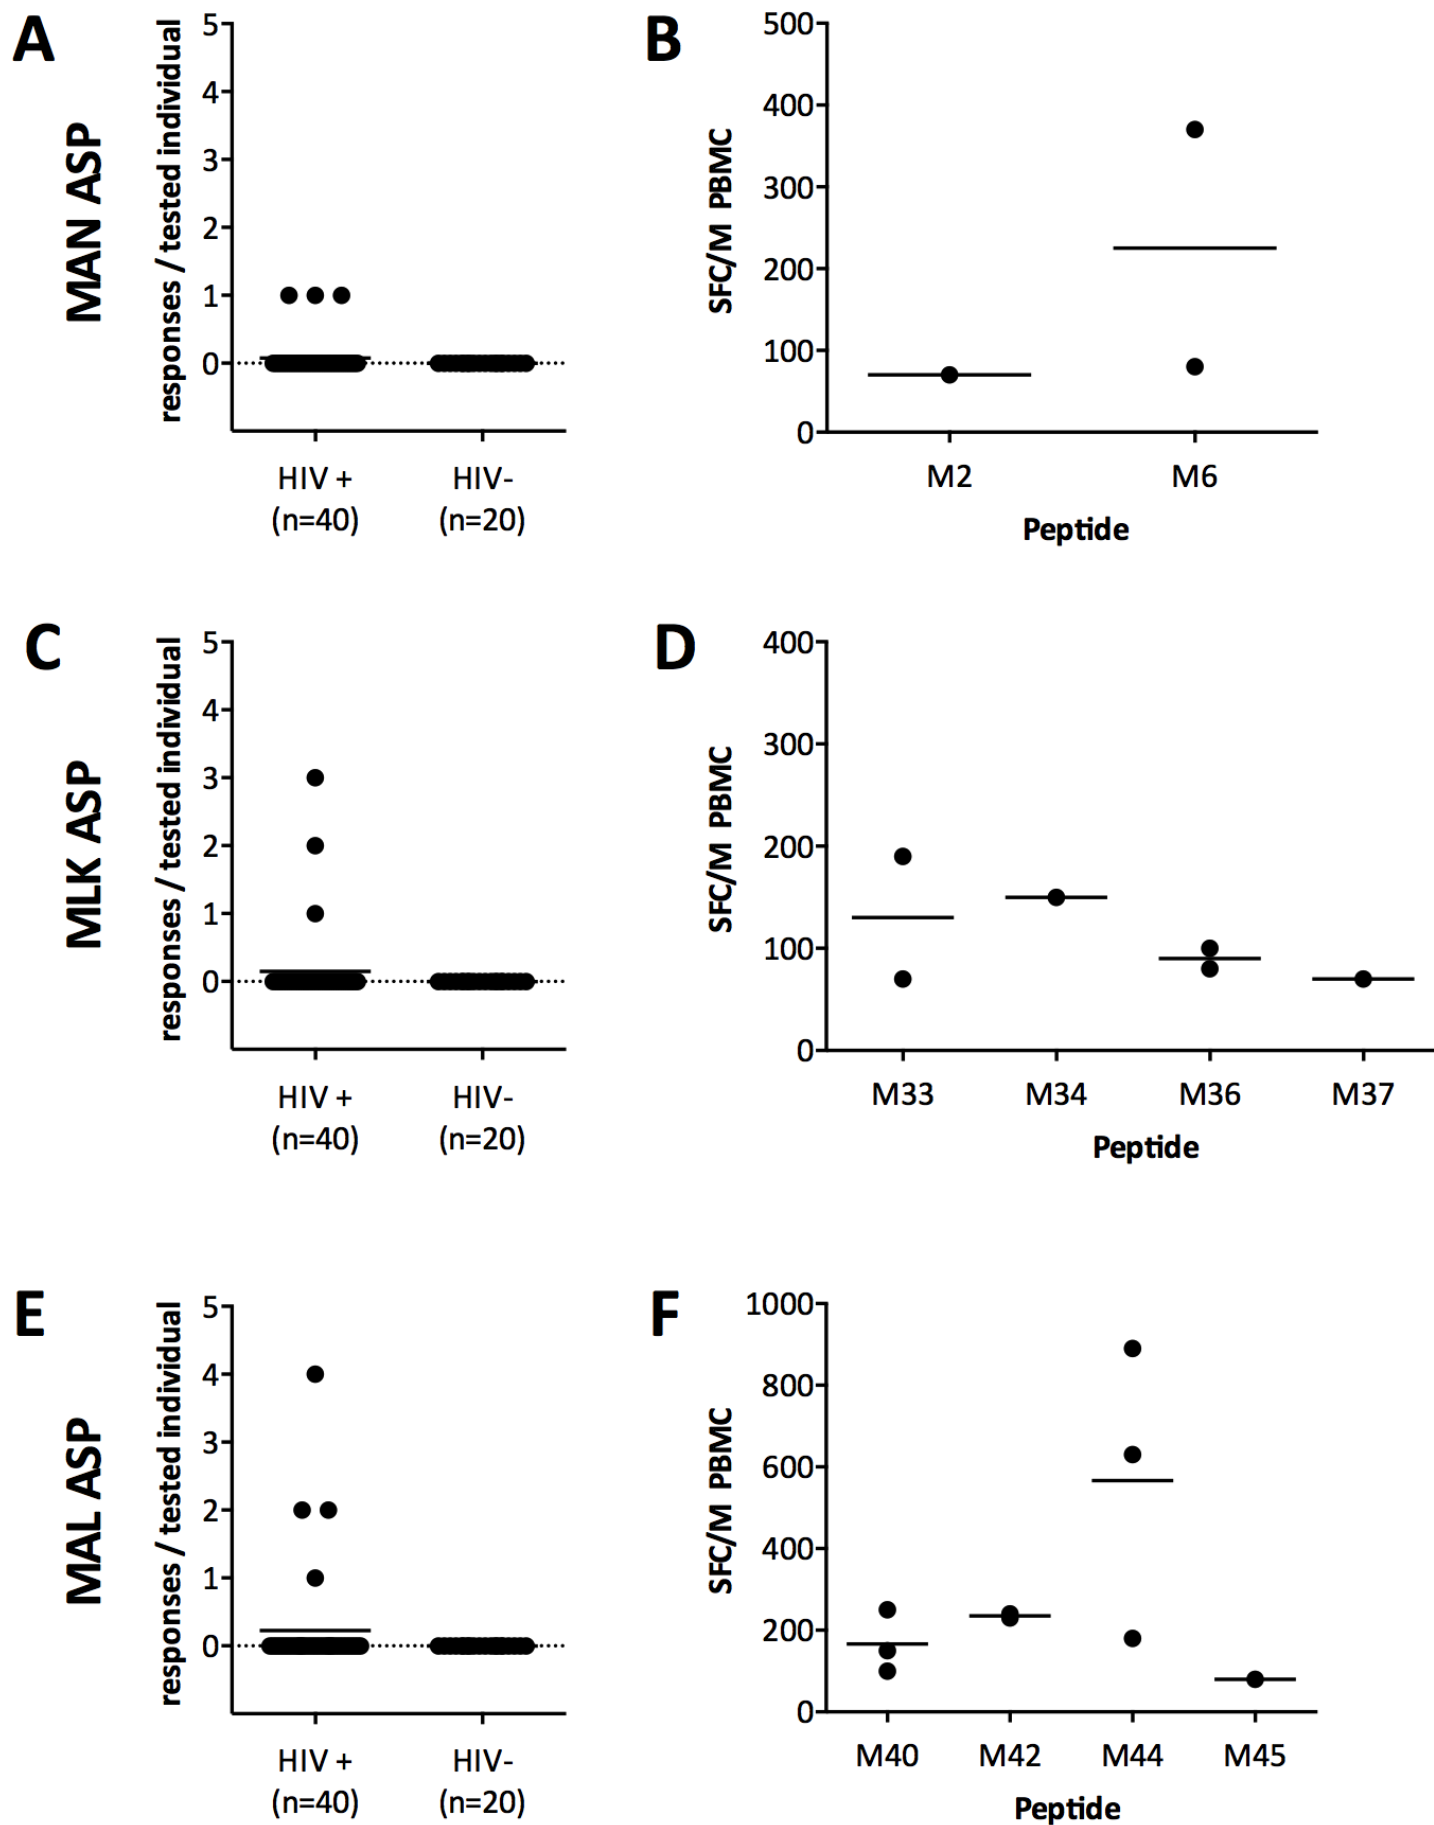

**Supplementary Figure 1: CTL responses to anti-sense proteins are common and HIV specific.** PBMC were tested in ELISpot for reactivity against overlapping peptides (OLP) at a peptide concentration of 28µg/ml as described. Responses of >50 spot forming cells per Million (SFC/M) PBMC were considered positive. Breadth (i.e. number of responses per tested individual) and magnitudes (SFC/M PBMC using single peptides) of the positive responses to the MAN (A, B), the MLK (C,D) and MAL (E, F) protein sequences are shown.

**Supplementary Table 1: Set of overlapping peptides included in the immune analysis**

| <b>OLP ID</b> | <b>Putative protein</b> | <b>Relative to</b> | <b>Sequence [targeted OLP in bold]</b> |
|---------------|-------------------------|--------------------|----------------------------------------|
| M1            | MAN                     | Pol                | MANTGVLYGFSGPIFEIF                     |
| M2            | MAN                     | Pol                | <b>GFSGPIFEIFPSFSISVQ</b>              |
| M3            | MAN                     | Pol                | IFPSFSISVQISTNAFIF                     |
| M4            | MAN                     | Pol                | VQISTNAFIFSSVNGHCL                     |
| M5            | MAN                     | Pol                | IFSSVNGHCLTFGPSIPG                     |
| M6            | MAN                     | Pol                | <b>CLTFGPSIPGFNFTGTVS</b>              |
| M7            | MAN                     | Pol                | PGFNFTGTVSIGLMGKFK                     |
| M8            | MAN                     | Pol                | VSIGLMGKFKVQPI                         |
| M9            | MPQ                     | Env                | MPQTVSCNRCCASIAL                       |
| M10           | MPQ                     | Env                | NRCCASIALSKLFCCCTI                     |
| M11           | MPQ                     | Env                | LSKLFCCCTIPDNNCLA                      |
| M12           | MPQ                     | Env                | <b>CTIPDNNCLACTVSVIDA</b>              |
| M13           | MPQ                     | Env                | <b>LACTVSVIDAAPIVLPAA</b>              |
| M14           | MPQ                     | Env                | DAAPIVLPAAKPNPRNIA                     |
| M15           | MPQ                     | Env                | AAPKNPRNIAPIPTALF                      |
| M16           | MPQ                     | Env                | NIAPIPTALFSLCTLLLF                     |
| M17           | MPQ                     | Env                | LFSLCTLLLFALVGA                        |
| M18           | MPQ                     | Env                | TLLLFALVGATPNGSIF                      |
| M19           | MPQ                     | Env                | VGATPNGSIFTTLYLY                       |
| M20           | MPQ                     | Env                | <b>GSIFTTLYLYNSLLQLSL</b>              |
| M21           | MPQ                     | Env                | LYNSLLQLSLISPPPGLK                     |
| M22           | MPQ                     | Env                | <b>SLISPPPGLKISVSLL</b>                |
| M23           | MPQ                     | Env                | PGLKISVSLLPPSLV                        |
| M24           | MPQ                     | Env                | SVLLPPSLVNSSPVIF                       |
| M25           | MPQ                     | Env                | SLVNSSPVIFDEHLICPL                     |
| M26           | MPQ                     | Env                | IFDEHLICPLMGGAYIAF                     |
| M27           | MPQ                     | Env                | <b>PLMGGAYIAFPTSCHMFI</b>              |
| M28           | MPQ                     | Env                | <b>AFPTSCHMFIICFILH</b>                |
| M29           | MPQ                     | Env                | HMFIICFILHGSVIFPSV                     |
| M30           | MPQ                     | Env                | <b>LHGSVIFPSVLFQVVPFQV</b>             |
| M31           | MPQ                     | Env                | <b>SVLFQVVPFQVLLNSCVVLQ</b>            |
| M32           | MLK                     | Env                | MLKFSVTFSTNTSCGL                       |
| M33           | MLK                     | Env                | <b>TFSNTTSCGLGSVGTQA</b>               |
| M34           | MLK                     | Env                | <b>CGLGSVGTQACVAQTL</b>                |
| M35           | MLK                     | Env                | GTQACVAQTLCTSVSYAL                     |
| M36           | MLK                     | Env                | <b>TLCTSVSYALASDAQNRV</b>              |
| M37           | MLK                     | Env                | <b>ALASDAQNRVVVASFH</b>                |
| M38           | MLK                     | Env                | QNRVVVASFHTGTP                         |
| M39           | MAL                     | Pol                | MALDKFDMSIGLAPASVF                     |
| M40           | MAL                     | Pol                | <b>SIGLAPASVFLLSLLM</b>                |
| M41           | MAL                     | Pol                | SVFLLSLLMGHNTLHVL                      |
| M42           | MAL                     | Pol                | LMGHNTLHVLVLES PCF                     |
| M43           | MAL                     | Pol                | VLVLES PCFLPVLALLL                     |
| M44           | MAL                     | Pol                | <b>CFLPVLALLLLLVLLLL</b>               |
| M45           | MAL                     | Pol                | <b>LLLLVLLLLLVWFP</b>                  |
| M46           | MGS                     | Pol                | <b>MGSNLGVFPHITMLSVA</b>               |
| M47           | MGS                     | Pol                | FPHITMLSVAIFCTASV                      |
| M48           | MGS                     | Pol                | <b>SVAIFCTASVNCFTSLVW</b>              |
| M49           | MGS                     | Pol                | <b>SVNCFTSLVWAPLILAYF</b>              |
| M50           | MGS                     | Pol                | <b>VWAPLILAYFPVFRFL</b>                |
| M51           | MGS                     | Pol                | <b>LAYFPVFRFLNGS</b>                   |
